# Supplementary material
Source: PubMed Central journal article supplement (PMC2817602)
Supplement: me.2009-0346_1.pdf [file me.2009-0346_1.pdf]

## Supplemental Figure 1

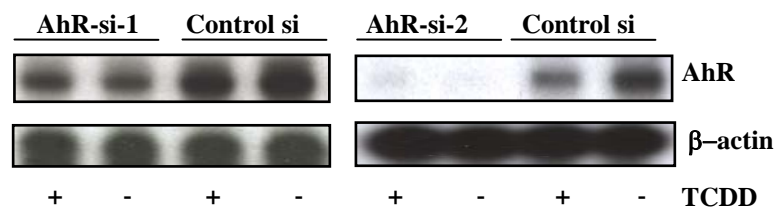

**Suppl. Fig. 1.** Expression of endogenous AhR protein in human breast cancer cells. SKBR3 cells were transfected with either a nontargeting siRNA duplex (Control si) or one of two independent AhR siRNAs (AhR-si-1, AhR-si-2). After 24 h cells were treated with Veh or TCDD (10 nM) for 24 h. 48 h post-transfection cells were harvested for total cellular protein. Cell extracts (20 µg/sample) were separated by electrophoresis and proteins were transferred to a PVDF membrane. Western blotting of SKBR3 cell extracts was performed with an anti-AhR antibody. Membranes were stripped and rehybridized with a β-actin antibody for normalization for protein content.

## Supplemental Figure 2

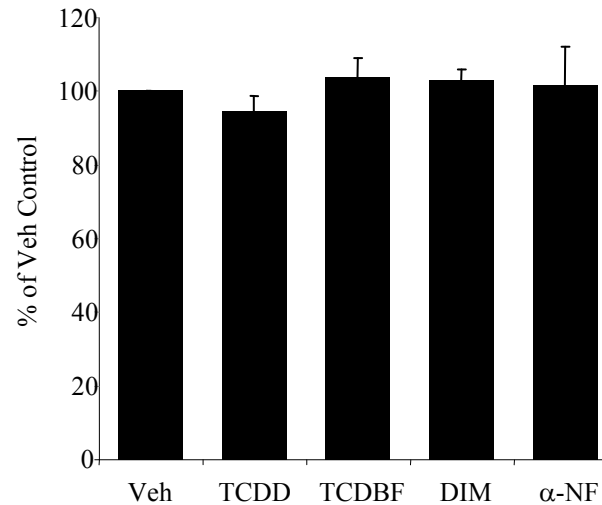

**Suppl. Fig. 2.** AhR Agonists Do Not Inhibit Colonization of HeLa Cells. Results from the soft agar colony formation assay. Anchorage-independent growth of HeLa cells (which lack detectable AhR activity) following continuous exposure to multiple AhR ligands (TCDD, 10 nM; TCDBF, 10 nM; and DIM, 20  $\mu$ M) and the AhR antagonist  $\alpha$ -NF (10  $\mu$ M) for 21 days. Cells were plated in 6 well plates in soft agar containing AhR ligand and overlaid with media containing ligand. Graphical data are represented as % of Vehicle (Veh) control (set at 100%). (n = 3 independent assays; no statistically significant differences exist between treatments).
